## CORRECTION

# Correction: The surveillance of the epidemiological and serotype characteristics of hand, foot, mouth disease in Neijiang city, China, 2010-2017: A retrospective study

The *PLOS ONE* Staff

The Data Availability statement for this paper is incorrect. The correct statement is: A de-identified dataset is provided in the Supporting Information files. Please contact the corresponding author Peibin Zeng ([zengpeibin@live.cn](mailto:zengpeibin@live.cn)).

The Funding statement for this paper is incorrect. The correct statement is: The study was supported by the Key Research and Development Project, Department of Science and Technology, Sichuan Province (Grant No. 2018SZ0212), the Fundamental Research Funds for the Central Universities. The funders had no role in the study design, data collection and analysis, decision to publish, or preparation of the manuscript. The publisher apologizes for the errors.

## Reference

1. Li J, Yang Z, Wang Z, Xu Y, Luo S, Yu X, et al. (2019) The surveillance of the epidemiological and serotype characteristics of hand, foot, mouth disease in Neijiang city, China, 2010–2017: A retrospective study. *PLoS ONE* 14(6): e0217474. <https://doi.org/10.1371/journal.pone.0217474> PMID: 31170178

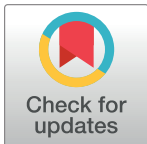

## OPEN ACCESS

**Citation:** The *PLOS ONE* Staff (2019) Correction: The surveillance of the epidemiological and serotype characteristics of hand, foot, mouth disease in Neijiang city, China, 2010-2017: A retrospective study. *PLoS ONE* 14(7): e0219726. <https://doi.org/10.1371/journal.pone.0219726>

**Published:** July 10, 2019

**Copyright:** © 2019 The PLOS ONE Staff. This is an open access article distributed under the terms of the [Creative Commons Attribution License](https://creativecommons.org/licenses/by/4.0/), which permits unrestricted use, distribution, and reproduction in any medium, provided the original author and source are credited.
